# Supplementary material for: Association of Dietary Habits and Interest for Food and Science versus Weight Status in Children Aged 8 to 18 Years
Source: Hindawi journal article supplement (doi:10.1155/2018/4061385), 2018-01-01
Supplement: f1 [file 4061385.f1.pdf]

## Supplementary material

### Questionnaire

What is your gender?                      ☐ Man                      ☐ Woman

What is your zipcode?                      \_\_\_\_\_

What is your year of birth?                      \_\_\_\_\_

How would you rate your health on a scale from 1 to 100 where 1 corresponds to "very poor" and 100 "very good"? Put a cross on the line.

1-----100

Weight:                      \_\_\_\_\_kg

Height:                      \_\_\_\_\_cm

Abdominal circumference:                      \_\_\_\_\_cm

Blood pressure:                      \_\_\_\_/\_\_\_\_mmHg

Are you affiliated with a sports club?                      ☐ Yes                      ☐ No                      ☐ Don't know

Did you have some **sweets** yesterday?                      ☐ Yes                      ☐ No                      ☐ Don't know

Did you have some soft drinks yesterday?                      ☐ Yes                      ☐ No                      ☐ Don't know

Did you have breakfast yesterday?                      ☐ Yes                      ☐ No                      ☐ Don't know

Did you have dinner yesterday?                      ☐ Yes                      ☐ No                      ☐ Don't know

Did you have supper yesterday?                      ☐ Yes                      ☐ No                      ☐ Don't know

Did you have some vegetables yesterday?                      ☐ Yes                      ☐ No                      ☐ Don't know

Did you have some fruit yesterday?                      ☐ Yes                      ☐ No                      ☐ Don't know

Did you have some meat yesterday?                      ☐ Yes                      ☐ No                      ☐ Don't know

Did you have some bread yesterday?                      ☐ Yes                      ☐ No                      ☐ Don't know

Did you have some milk or yoghurt yesterday?                      ☐ Yes                      ☐ No                      ☐ Don't know

How do you usually go to school?                      ☐ By bus or car                      ☐ On foot or by bicycle
